# Supplementary material for: Circulating tumor DNA and Response Evaluation Criteria In Solid Tumors: ctDNA-RECIST proof-of-concept in HER2-positive metastatic breast cancer
Source: Research Square preprint supplement (doi:10.21203/rs.3.rs-7101376/v1), 2025-07-18
Supplement: Supplementary file 1 [file 01e2b8e36ddefbe9104ccf44.xlsx]

## Sheet: Fig.2_V32
	Detectable cPD vs no detectable cPD								Detectable cPD vs no detectable cPD									pts	Death	alive
	b	pts	PFS (days)	cPD negative	cPD positive				c	pts	OS (days)	cPD negative	cPD positive
		12	475	1						12	930	1						12	1
		13	56	1						13	51	1						13	1
		15	322	1						15	971	1						15	1
		16	294	1						16	1723	1						16		1
		17	174		1					17	329		1					17	1
		18	154		1					18	1020		1					18	1
		19	770		1					19	1358		1					19		1
		20	434		1					20	1892		1					20		1
		21	42	1						21	90	1						21	1
		22	287		1					22	551		1					22	1
		23	175		1					23	231		1					23	1
		24	175		1					24	238		1					24	1
		25	196		1					25	979		1					25	1
		26	287		1					26	615		1					26	1
		27	679	1						27	1793	1						27		1
		28	182		1					28	220		1					28	1
		29	98	1						29	1058	1						29	1
		30	987		1					30	1624		1					30		1
		31	581		1					31	824		1					31	1
		33	84		1					33	1599		1					33		1
		34	532		1					34	548		1					34	1
		35	147	1						35	1515	1						35		1
		36	672	1						36	1351	1						36		1
		37	182		1					37	413		1					37	1
		38	154		1					38	233		1					38	1
		40	264		1					40	777		1					40	1
		41	477	1						41	872	1						41		1
		42	543		1					42	1336		1					42		1
		44	315		1					44	1134		1					44		1
		45	146	1						45	921	1						45	1
		47	854	1						47	1121	1						47		1
		48	146		1					48	1082		1					48		1
		50	84		1					50	699		1					50		1
		51	330		1					51	968		1					51		1
		52	147		1					52	943		1					52		1
		56	62		1					56	99		1					56	1
		57	182		1					57	989		1					57		1
		58	75		1					58	720		1					58	1

## Sheet: Fig.3_V32
	Fig.3 cRECIST
	pt#		T0	T1	T2	T3	T4	T5	T6	T7	T8	T9	T10	T11	T12	T13	T14	T15	T16	T17	T18	T19	T20	T21	T22	T23	T24	T25	T26	T27
	17	ESR1 p.D538G	0.4	0.23	0.15	0.14	0.13	0.39	0.85	1.41
		ESR1 p.Y537S	0.05	0.1	0.54	0.76	1.96	3.6	4.6	5.2
		ESR1 p.Y537N	0	0	0	0	0	0	0.05	0.2
		FGFR1 (amp)	0.95				2.82			3.15
		∑	1.4	0.33	0.69	0.9	4.91	3.99	5.5	9.96
		∆ctDNA		-0.764286	1.09091	1.72727	13.8788	11.0909	15.6667	0.810909
	18	PIK3CA p.H1047R	8.6	7.6	3.6	3.2	2.5	12.5	9.4	6.6
		TP53 p.E294*	3.4	2.6	1.4	1.2	1	6.2	5.47	3.8
		ERBB2 (amp)	1.42		1.09			1.29		0.98
		∑	13.42	10.2	6.09	4.4	3.5	19.99	14.87	11.38
		∆ctDNA		-0.23994	-0.402941	-0.277504	-0.204545	4.71143	3.24857	-0.234701
	19	ERBB2 p.L755S	3.9	0.3	0.1	0	0	0	0	0	0	0.03	0	0	0.33	0.31	0.3	0.43	0.58	1.7	1.8	2.1	2.3	2.4	2.9	3.9	4.1	4.4
		PIK3CA p.G914R	2.8	0.16	0.07	0.02	0.02	0.09	0.11	0.07	0.02	0.03	0.03	0.07	0.16	0	0.22	0.34	0.63	1.2	1.4	1.6	1.6	2.9	3.3	3.7	4	4.2
		ERBB2 amp	1.3	1.01			1.03					1.02				1				0.97				0.95		1.24	1.54	1.48
		∑	8	1.47	0.17	0.02	1.05	0.09	0.11	0.07	0.02	1.08	0.03	0.07	0.49	1.31	0.52	0.77	1.21	3.87	3.2	3.7	3.9	6.25	6.2	8.84	9.64	10.08
		∆ctDNA		-0.81625	-0.884354	-0.882353	51.5	-0.914286	0.222222	-0.363636	-0.714286	53	-0.972222	1.33333	6	1.67347	-0.603053	0.480769	0.571429	2.19835	-0.173127	0.15625	0.0540541	0.602564	-0.008	0.425806	0.0904977	0.0456432
	20	ESR1 p.S463P	0.97	0.08	0	0	0	0	0	0	0	0	0	0	0	0	0.03	0.06	0.37
		∆ctDNA		-0.917526	-1													1	5.16667
	22	ESR1 p.D538G	0.3	4.64	6.32	16.21	7.24	2.24	5.1	0.33	5.9
		ESR1 p.Y537C					0.11				0
		TP53 p.C238Y					0				0.3
		TP53 p.R213Q					0				0.1
		∑	0.3	4.64	6.32	16.21	7.35	2.24	5.1	0.33	6.3
		∆ctDNA		14.4667	0.362069	1.56487	-0.546576	-0.695238	1.27679	-0.935294	18.0909
	23	ESR1 p.D538G	0.1	0.13	0.08	0.08	0.29	0.21
		TP53 p.H193R	3.47	2.35	1.99	2.78	1.7	1.9
		∑	3.57	2.48	2.07	2.86	1.99	2.11
		∆ctDNA		-0.305322	-0.165323	0.381643	-0.304196	0.0603015
	24	PIK3CA p.E545K	35.76	0.7	0.47	0.17	13.96
		ERBB2 amp	2.03				1.35
		CCND1 (amp)	4.71				2.65
		CDK4 (amp)	2.56				1.68
		∑	45.06	0.7	0.47	0.17	19.64
		∆ctDNA		-0.984465	-0.328571	-0.638298	114.529
	25	ESR1 p.E380Q	0	0	0	0	2.5
		TP53 p.M246V	0	0.07	0.08	0	0.3
		∆ctDNA	NEW ctDNA
	26	PIK3CA p.E545K	0.6	0.15	0.7	0.2	0.6
		∆ctDNA		-0.75	3.66667	-0.714286	2
	28	TP53 p.N345I	4.4	0.08	0	0.01	0.15	1.02	0.25
		ERBB2 (amp)	1.36						1.06
		∑	5.76	0.08	0	0.01	0.15	1.02	1.31
		∆ctDNA		-0.986111	-1		14	5.8	0.284314
	30	MYC (amp)	2.04	2.08		2.02	2.35	2.82	2.91	2.43	3.54		2.72		2.32	2.26	2.5		3.3
		∆ctDNA		0	0.0196078		-0.0288462	0.163366	0.39604	0.440594	0.20297	0.506383		-0.0652921		-0.344633	0.118812	0.237624	0.633663
	31	PIK3CA p.H1047R	12.5	0.4	0.52	5.5	8.1	6.9	2.8	3.3	5	7.7	9	5.3	16.1	10.3	10.2	10.9	11.4	10.9	12.6	11.9	8.8	9	21.6	29.3
		TP53 p.V172F	5.9	0.3	0	0	2.7	1.9	0.4	1.3	2.5	3.9	3.6	2.8	7.9	6.1	5.8	5.2	7.13	7.31	8.22	6.5	3.3	4.3	13.2	16.5
		∑	18.4	0.7	0.52	5.5	10.8	8.8	3.2	4.6	7.5	11.6	12.6	8.1	24	16.4	16	16.1	18.53	18.21	20.82	18.4	12.1	13.3	34.8	45.8
		∆ctDNA		-0.961957	-0.257143	9.57692	0.963636	-0.185185	-0.636364	0.4375	0.630435	0.546667	0.0862069	-0.357143	1.96296	-0.316667	-0.0243902	0.00625	0.150932	-0.0172693	0.143328	-0.116234	-0.342391	0.0991736	1.61654	0.316092
	33	TP53 p.Y220C	0	0.5
		∆ctDNA
	34	ERBB2 p.L755S	1.95	8.4	4.49	3.6	5.54	5.31	4.58	4.09	5.1	6.67	13.57	7.62	13.58	28.55	25.51	22.9	34.6	32.8	34.74	35.79	39.81	34.51	34.89	42.85	34.44	42.3
		KRAS p.G12C	3.92	11.68	5.67	4.34	6.33	5.3	5.86	4.05	6.9	7.64	13.02	7.16	11.91	27.73	21.5	18.59	29.45	28.9	31	33.18	39.1	32.86	33.45	39.61	28.73	37.4
		∑	5.87	20.08	10.16	7.94	11.87	10.61	10.44	8.14	12	14.31	26.59	14.78	25.49	56.28	47.01	41.49	64.05	61.7	65.74	68.97	78.91	67.37	68.34	82.46	63.17	79.7
		∆ctDNA		2.42078	-0.494024	-0.218504	0.494962	-0.10615	-0.0160226	-0.220307	0.474201	0.1925	0.858141	-0.444152	0.724628	1.20792	-0.164712	-0.117422	0.543745	-0.0366901	0.0654781	0.0491329	0.144121	-0.146243	0.0143981	0.206614	-0.233932	0.261675
	37	CCND2 (amp)			1.06	1.67
		∆ctDNA	NEW ctDNA
	38	TP53 p.A276D	7.3	0.81	0.79	1.18	4.7	12		20.02
		SMAD4 p.R361H	0.09			0				0
		KIT p.D816Y	0			0				0.42
		∑	7.39	0.81	0.79	1.18	4.7	12	0	20.44
		∆ctDNA		-0.890392	-0.0246914	0.493671	2.98305	1.55319	-1	#DIV/0!
	40	TP53 p.S127F	2.06	0.5	2.29	2.28	0
		ERBB2 (amp)	0.89	1.32	1.17		4.47
		∑	2.95	1.82	3.46	2.28	4.47
		∆ctDNA		-0.383051	0.901099	-0.34104	0.960526
	42	PIK3CA p.E545K	0.64	0.06	0.12	0.19	0.04	0.59	0.83		1.05
		TP53 p.P278A	0.68
		∑	1.32	0.06	0.12	0.19	0.04	0.59	0.83	0	1.05
		∆ctDNA		-0.954545	1	0.583333	-0.789474	13.75	0.40678	-1	#DIV/0!
	44	TP53 p.G245D	0	0	0	0	0.5		0.86
		ERBB2 (amp)	0.99		0.99		1.12		1.85
		∑	0.99	0	0.99	0	1.62	0	2.71
		∆ctDNA			0		0.636364		0.67284
	45	TP53 p.R213	11	5.08	3.97	7.16	7.3
		∆ctDNA		-0.538182	-0.218504	0.803526	0.0195531
	48	PIK3CA p.C420R	0.28	0	0	0	0	1.02
		TP53 p.C135F	0.11	0	0	0	0	0
		∑	0.39	0	0	0	0	1.02
		∆ctDNA		-1
	50	ESR1 p.E380Q	0.47	0.14	0.09	0.21	0.34
		PIK3CA p.E545K	0.11	0.14	0.06	0.05	0.08
		∑	0.58	0.28	0.15	0.26	0.42
		∆ctDNA		-0.517241	-0.464286	0.733333	0.615385
	51	AKT1 p.E17K	0.87	0.82452	0.35455	0.210043	0.746226	0.837801	0.764038	2.92417	0.929858	1.39578	0.559908	1.22337	4.22189	4,5
		GNAS p.R201C	0.45				0.91				0.53					0.58
		∑	1.32	0.82452	0.35455	0.210043	1.65623	0.837801	0.764038	2.92417	1.45986	1.39578	0.559908	1.22337	4.22189	0.58
		∆ctDNA		-0.375364	-0.569992	-0.407579	6.88518	-0.49415	-0.0880445	2.82725	-0.500761	-0.0438965	-0.598855	1.18494	2.45105	-0.862621
	52	ESR1 p.D538G	28.65	0.08	0	1.84	1.88
		ERBB2 p.L755S	0.82	1.2	0.83	0.98	1.69
		ERBB2 p.D769Y	2.1	0	0	0	0
		∑	31.57	1.28	0.83	2.82	3.57
		∆ctDNA		-0.959455	-0.351563	2.39759	0.265957
	56	ERBB2 amp	4.25	2.14	2.1	2.09
		FGFR1 (amp)	0	2.1	3.6	5.5
		PIK3CA p.E545K	34.5	15.6	12.1	10.6
		TP53 p.G266V	72.28	34.5	20.1	18.9
		∆ctDNA	NEW ctDNA
	57	PIK3CA p.E545K	16.4	2.3	1.8	3.2	6.7	20.1
		TP53 p.H179L	2.2	0.5	0.3	10.6	0.6	2.2
		∑	18.6	2.8	2.1	13.8	7.3	22.3
		∆ctDNA		-0.849462	-0.25	5.57143	-0.471014	2.05479
	58	TP53 p.C141Y	0.95	6.4	6.6
		∑
		∆ctDNA		5.73684	0.03125

## Sheet: Fig.4_V32
		OR vs PFS								OR vs OS								OR vs cPFS
		b	pts	PFS (days)	PR/CR	SD	PD			c	pts	OS (days)	CR	SD	PD			d	pts	cPFS (days)	CR/PR	SD	PD
			17	174		1					17	329		1					17	41		1
			18	154		1					18	1020		1					18	112		1
			19	770		1					19	1358		1					19	231		1
			20	434	1						20	1892	1						20	378	1
			22	287		1					22	551		1					22	21		1
			23	175		1					23	231		1					23	70		1
			24	175		1					24	238		1					24	175		1
			25	196		1					25	979		1					25	42		1
			26	287		1					26	615		1					26	49		1
			28	182		1					28	220		1					28	91		1
			30	987	1						30	1624	1						30	336	1
			31	581		1					31	824		1					31	63		1
			33	84			1				33	1599			1				33	84			1
			34	532		1					34	548		1					34	21		1
			37	182		1					37	413		1					37	126		1
			38	154		1					38	233		1					38	63		1
			40	264		1					40	777		1					40	21		1
			42	543		1					42	1336		1					42	47		1
			44	315	1						44	1134	1						44	126	1
			45	146		1					45	921		1					45	62		1
			48	146		1					48	1082		1					48	146		1
			50	84			1				50	699			1				50	63			1
			51	330		1					51	968		1					51	84		1
			52	147		1					52	943		1					52	105		1
			56	62			1				56	99			1				56	21			1
			57	182		1					57	989		1					57	65		1
			58	75			1				58	720			1				58	40			1
		cOR vs PFS								cOR vs OS								cOR vs cPFS
		f	pts	PFS (days)	PR/CR	SD	PD			g	pts	OS (days)	CR/PR	SD	PD			h	pts	cPFS (days)	CR/PR	SD	PD
			17	174		1					17	329		1					17	41		1
			18	154	1						18	1020	1						18	112	1
			19	770	1						19	1358	1						19	231	1
			20	434	1						20	1892	1						20	378	1
			22	287			1				22	551			1				22	84			1
			23	175		1					23	231		1					23	70		1
			24	175	1						24	238	1						24	175	1
			25	196			1				25	979			1				25	42			1
			26	287	1						26	615	1						26	49	1
			28	182	1						28	220	1						28	91	1
			30	987		1					30	1624		1					30	336		1
			31	581	1						31	824	1						31	63	1
			33	84		1					33	1599		1					33	84		1
			34	532			1				34	548			1				34	21			1
			37	182			1				37	413			1				37	126			1
			38	154	1						38	233	1						38	63	1
			40	264	1						40	777	1						40	21	1
			42	543	1						42	1336	1						42	47	1
			44	315			1				44	1134			1				44	126			1
			45	146	1						45	921	1						45	62	1
			48	146	1						48	1082	1						48	146	1
			50	84	1						50	699	1						50	63	1
			51	330		1					51	968		1					51	84		1
			52	147	1						52	943	1						52	105	1
			56	62			1				56	99			1				56	21			1
			57	182	1						57	989	1						57	65	1
			58	75			1				58	720			1				58	40			1

## Sheet: Fig.4b_V32
		PD,cPD,Lead Time								ranking x lead time
		i	pts	PFS	cPFS	LT				j	pts	cPD	PD
			17	174	41	133					24	175	175			above 182 days
			18	154	112	42					33	84	84
			19	770	231	539					48	146	146
			20	434	378	56					50	63	84
			22	287	21	203					58	40	75
			23	175	70	105					56	21	62
			24	175	175	0					18	112	154
			25	196	42	154					52	105	147
			26	287	49	238					20	378	434
			28	182	91	91					37	126	182
			30	987	336	651					45	62	146
			31	581	63	518					28	91	182
			33	84	84	0					38	63	154
			34	532	21	511					23	70	175
			37	182	126	56					57	65	182
			38	154	63	91					17	41	174
			40	264	21	243					22	21	287
			42	543	47	496					25	42	196
			44	315	126	259					44	126	315
			45	146	62	84					26	49	287
			48	146	146	0					40	21	264
			50	84	63	21					51	84	330
			51	330	84	246					42	47	543
			52	147	105	42					34	21	532
			56	62	21	41					31	63	581
			57	182	65	117					19	231	770
			58	75	40	35					30	336	987
		PFS vs LT								PFS vs cPFS								cPFS vs LT
		k	pts	PFS (days)	Lead Time (days)					l	pts	PFS (days)	cPFS (days)					m	pts	cPFS (days)	Lead Time
			17	174	133						17	174	41						17	41	133
			18	154	42						18	154	112						18	112	42
			19	770	539						19	770	231						19	231	539
			20	434	56						20	434	378						20	378	56
			22	287	203						22	287	21						22	21	203
			23	175	105						23	175	70						23	70	105
			24	175	0						24	175	175						24	175	0
			25	196	154						25	196	42						25	42	154
			26	287	238						26	287	49						26	49	238
			28	182	91						28	182	91						28	91	91
			30	987	651						30	987	336						30	336	651
			31	581	518						31	581	63						31	63	518
			33	91	0						33	91	84						33	84	0
			34	532	511						34	532	21						34	21	511
			37	182	56						37	182	126						37	126	56
			38	154	91						38	154	63						38	63	91
			40	264	243						40	264	21						40	21	243
			42	543	496						42	543	47						42	47	496
			44	315	259						44	315	126						44	126	259
			45	146	84						45	146	62						45	62	84
			48	146	0						48	146	146						48	146	0
			50	84	21						50	84	63						50	63	21
			51	330	246						51	330	84						51	84	246
			52	147	42						52	147	105						52	105	42
			56	62	41						56	62	21						56	21	41
			57	182	117						57	182	65						57	65	117
			58	75	35						58	75	40						58	40	35

## Sheet: Fig.5_V32
	c	PTS	PFS (days)	1st decrease	1st increase	LEAD TIME
	linear regression	17	174			0
		18	154			0
		19	770	315	441	126
		20	434			0
		23	175	133	175	42
		28	182			0
		30	987	728	987	259
		31	581	126	196	70
		34	532	84	112	28
		38	154			0
		42	543	70	228	158
		48	146	133	146	13
		50	84			0
		51	330	210	266	56
		57	182			0
	c	pts	LT (days)	1st decrease	1st increase	LEAD TIME
	linear regression	17	133			0
		18	42			0
		19	539	315	441	126
		20	56			0
		23	105	133	175	42
		28	91			0
		30	651	728	987	259
		31	518	126	196	70
		34	511	84	112	28
		38	91			0
		42	496	70	228	158
		48	0	133	146	13
		50	21			0
		51	246	210	266	56
		57	117			0
	c	pts	OS (days)	1st decrease	1st increase	LEAD TIME
	linear regression	17	329			0
		18	1020			0
		19	1358	315	441	126
		20	1892			0
		23	231	133	175	42
		28	220			0
		30	1624	728	987	259
		31	824	126	196	70
		34	548	84	112	28
		38	233			0
		42		70	228	158
		48	1082	133	146	13
		50	699			0
		51	968	210	266	56
		57	989			0

## Sheet: Fig.S1a_V32
	a	oncoprint
				ID			PT id	AGE		# hits	cancer-type	gene	alteration	type	Metastatic_site	N°_Metastatic_site
				12	N/A	N/A		41			Breast	N/A	N/A	N/A	BRAIN	1
		1		12			12	41		3	Breast	PIK3CA	E542K	MISSENSE	BRAIN	3
				12			12	41			Breast	TP53	Q38H	MISSENSE	BRAIN	3
				12			12	41			Breast	TP53	p.D324fs	MISSENSE	BRAIN	3
		2		13	N/A	N/A	13	41		2	Breast	ERBB2	AMPLIFICATION	MISSENSE	BRAIN	3
				13	N/A	N/A	13	41			Breast	ERBB2	V777L	MISSENSE	BRAIN	3
		3		15	N/A	N/A	15	46		1	Breast	TP53	R175H	MISSENSE	N/A	3
		4		16			16	53		2	Breast	TP53	W146S	MISSENSE	LIVER	1
				16			16	53			Breast	TP53	S15*	MISSENSE	LIVER	1
		5		17	N/A	N/A	17	56		5	Breast	ESR1	D538G	MISSENSE	LYMPHNODES	3
				17	N/A	N/A	17	56			Breast	ESR1	Y537S	MISSENSE	LYMPHNODES	3
				17	N/A	N/A	17	56			Breast	ESR1	Y537N	MISSENSE	LYMPHNODES	3
				17	N/A	N/A	17	56			Breast	FGFR1	AMPLIFICATION	MISSENSE	LYMPHNODES	3
		6		18	N/A	N/A	18	61		3	Breast	PIK3CA	H1047R	MISSENSE	LIVER	3
				18	N/A	N/A	18	61			Breast	ERBB2	AMPLIFICATION	MISSENSE	LIVER	3
				18	N/A	N/A	18	61			Breast	TP53	E294*	MISSENSE	LIVER	3
		7		19	N/A	N/A	19	57		3	Breast	ERBB2	L755S	MISSENSE	BONE	2
				19	N/A	N/A	19	57			Breast	PIK3CA	G914R	MISSENSE	BONE	2
				19	N/A	N/A	19	57			Breast	ERBB2	AMPLIFICATION	MISSENSE	BONE	2
		8		20	N/A	N/A	20	58		1	Breast	ESR1	S463P	MISSENSE	SURRENE	3
		9		21	N/A	N/A	21	45		3	Breast	TP53	G245S	MISSENSE	BRAIN	3
				21	N/A	N/A	21	45			Breast	PIK3CA	p.E545K	MISSENSE	BRAIN	3
				21	N/A	N/A	21	45			Breast	ERBB2	AMPLIFICATION	MISSENSE	BRAIN	3
		10		22	N/A	N/A	22	75		4	Breast	ESR1	D538G	MISSENSE	BONE	2
				22	N/A	N/A	22	75			Breast	ESR1	Y537C	MISSENSE	BONE	2
				22	N/A	N/A	22	75			Breast	TP53	C238Y	MISSENSE	BONE	2
				22	N/A	N/A	22	75			Breast	TP53	R213Q	MISSENSE	BONE	2
		11		23	N/A	N/A	23	56		2	Breast	ESR1	D538G	MISSENSE	BONE	1
				23	N/A	N/A	23	56			Breast	TP53	H193R	MISSENSE	BONE	1
		12		24	N/A	N/A	24	69		4	Breast	ERBB2	AMPLIFICATION	MISSENSE	BONE	3
				24	N/A	N/A	24	69			Breast	PIK3CA	E545K	MISSENSE	BONE	3
				24	N/A	N/A	24	69			Breast	CCND1	AMPLIFICATION	MISSENSE	BONE	3
				24	N/A	N/A	24	69			Breast	CDK4	AMPLIFICATION	MISSENSE	BONE	3
		13		25	N/A	N/A	25	53		2	Breast	ESR1	E380Q	MISSENSE	LYMPHNODES	2
				25	N/A	N/A	25	53			Breast	TP53	M246V	MISSENSE	LYMPHNODES	2
		14		26	N/A	N/A	26	79		1	Breast	PIK3CA	E545K	MISSENSE	LYMPHNODES	3
		15		27	N/A	N/A	27	57		2	Breast	PIK3CA	E542K	MISSENSE	PANCREAS	3
				27	N/A	N/A	27	57			Breast	ERBB2	AMPLIFICATION	MISSENSE	PANCREAS	3
		16		28	N/A	N/A	28	75		2	Breast	TP53	M237I	MISSENSE	LYMPHNODES	2
				28	N/A	N/A	28	75			Breast	ERBB2	AMPLIFICATION	MISSENSE	LYMPHNODES	2
		17		29	N/A	N/A	29	58		2	Breast	TP53	S240R	MISSENSE	LIVER	3
				29	N/A	N/A	29	58			Breast	FGFR3	AMPLIFICATION	MISSENSE	LIVER	3
		18		30	N/A	N/A	30	46		1	Breast	MYC	AMPLIFICATION	MISSENSE	LYMPHNODES	1
		19		31	N/A	N/A	31	48		2	Breast	PIK3CA	H1047R	MISSENSE	BONE	3
				31	N/A	N/A	31	48			Breast	TP53	V172F	MISSENSE	BONE	3
				32	N/A	N/A	32	54			Breast	N/A	N/A	N/A	BRAIN	3
		20		33	N/A	N/A	33	55		1	Breast	TP53	Y220C	MISSENSE	BRAIN	1
		21		34	N/A	N/A	34	62		2	Breast	ERBB2	L755S	MISSENSE	LIVER	1
				34	N/A	N/A	34	62			Breast	KRAS	G12C	MISSENSE	LIVER	1
		22		35	N/A	N/A	35	58		1	Breast	ERBB2	AMPLIFICATION	MISSENSE	BONE	1
				36	N/A	N/A	36	49			Breast	N/A	N/A	N/A	N/A	1
		23		36			36	49		1	Breast	TP53	Q331H	MISSENSE	LYMPHNODES	1
		24		37	N/A	N/A	37	46		1	Breast	CCND2	AMPLIFICATION	MISSENSE	LYMPHNODES	3
		25		38	N/A	N/A	38	51		3	Breast	TP53	A276D	MISSENSE	LIVER	3
				38	N/A	N/A	38	51			Breast	SMAD4	R361H	MISSENSE	LIVER	3
				38	N/A	N/A	38	51			Breast	KIT	D816Y	MISSENSE	LIVER	3
		26		40	N/A	N/A	40	78		2	Breast	TP53	S127F	MISSENSE	LUNG	2
				40	N/A	N/A	40	78			Breast	ERBB2	AMPLIFICATION	MISSENSE	LUNG	2
				41	N/A	N/A	41	76			Breast	N/A	N/A	N/A	BREAST	3
		27		41	N/A	N/A	41	76		1	Breast	MYC	AMPLIFICATION	MISSENSE	CHEST	3
		28		42	N/A	N/A	42	66		2	Breast	PIK3CA	E545K	MISSENSE	CHEST	3
				43	N/A	N/A	43	59			Breast	N/A	N/A	N/A	PANCREAS	3
				42	N/A	N/A	42	66			Breast	TP53	P278A	MISSENSE	CHEST	3
		29		44	N/A	N/A	44	43		2	Breast	TP53	p.G245D	MISSENSE	LUNG	1
				44	N/A	N/A	44	43			Breast	ERBB2	AMPLIFICATION	MISSENSE	LUNG	1
		30		45	N/A	N/A	45	62		1	Breast	TP53	p.R213*	MISSENSE	BONE	2
				46	N/A	N/A	46	36			Breast	N/A	N/A	N/A	BREAST	2
		31		47	N/A	N/A	47	61		1	Breast	TP53	G245S	MISSENSE	BRAIN	2
		32		48	N/A	N/A	48	60		2	Breast	PIK3CA	C420R	MISSENSE	LUNG	2
				48	N/A	N/A	48	60			Breast	TP53	C135F	MISSENSE	LUNG	2
		33		50	N/A	N/A	50	55		2	Breast	ESR1	E380Q	MISSENSE	BONE	2
				50	N/A	N/A	50	55			Breast	PIK3CA	p.E545K	MISSENSE	BONE	2
		34		51	N/A	N/A	51	68		2	Breast	AKT1	E17K	MISSENSE	LUNG	2
				51	N/A	N/A	51	68			Breast	GNAS	R201C	MISSENSE	LUNG	2
		35		52	N/A	N/A	52	58		3	Breast	ESR1	D538G	MISSENSE	LUNG	2
				52	N/A	N/A	52	58			Breast	ERBB2	L755S	MISSENSE	LUNG	2
				52	N/A	N/A	52	58			Breast	ERBB2	D769Y	MISSENSE	LUNG	2
				53	N/A	N/A	53	43			Breast	N/A	N/A	N/A	BRAIN	1
				54	N/A	N/A	54	59			Breast	N/A	N/A	N/A	LIVER	3
		36		56	N/A	N/A	56	33		4	Breast	PIK3CA	E545K	MISSENSE	BRAIN	3
				56	N/A	N/A	56	33			Breast	TP53	G266V	MISSENSE	BRAIN	3
				56	N/A	N/A	56	33			Breast	ERBB2	AMPLIFICATION	MISSENSE	BRAIN	3
				56	N/A	N/A	56	33			Breast	FGFR1	AMPLIFICATION	MISSENSE	BRAIN	3
		37		57	N/A	N/A	57	52		2	Breast	PIK3CA	p.E545K	MISSENSE	LYMPHNODES	2
				57	N/A	N/A	57	52			Breast	TP53	p.H179L	MISSENSE	LYMPHNODES	2
		38		58	N/A	N/A	58	39		1	Breast	TP53	p.C141Y	MISSENSE	ESOPHAGUS	2
				59	N/A	N/A		87			Breast	N/A	N/A	N/A	LYMPHNODES	3
				60	N/A	N/A		53			Breast	N/A	N/A	N/A	BONE	1
				61	N/A	N/A		58			Breast	N/A	N/A	N/A	BRAIN	2
												78	17	CNVs
													61	SNVs

## Sheet: Fig.S1b_V32
	b		SNVs									CNVs
			VAF(%)									ratio
			pts	T0	Tp	T0	Tp	T0+Tp				pts	T0	Tp	T0	Tp	T0+Tp
		AKT p.E17K	51	0.87	4.5			1			CCND1	13	2.65	2.65			1
		ERBB2 p.D769Y	52	2.1		1					CCND2	17		1.67		1
		ERBB2 p.L755S	34	1.95	42.3			1			CDK4	18	1.68	1.68			1
		ERBB2 p.L755S	52	0.82	1.69			1			ERBB2	19		1.21		1
		ERBB2 p.L755S	19	3.9	4.4			1			ERBB2	22	1.42		1
		ERBB2 p.V777L	13	1.1		1					ERBB2	24	1.3	1.48			1
		ESR1 p.D538G	17	0.4	1.41			1			ERBB2	24	2.03	1.35			1
		ESR1 p.D538G	22	0.3	5.9			1			ERBB2	24	9.71		1
		ESR1 p.D538G	23	0.1	0.21			1			ERBB2	27	1.36		1
		ESR1 p.D538G	52	28.65	1.88			1			ERBB2	28	1.38		1
		ESR1 p.E380Q	25		2.5		1				ERBB2	29		4.47		1
		ESR1 p.E380Q	50	0.47	0.34			1			ERBB2	30		1.85		1
		ESR1 p.S463P	20	0.97	0.37			1			ERBB2	35	4.25	2.09			1
		ESR1 p.Y537N	17		0.2		1				ERBB2	37	5.67	3.86			1
		ESR1 p.Y537S	17	0.05	5.2			1			FGFR1	40		3.15			1
		GNAS p.R201C	51	0.45	0.58			1			FGFR1	41		5.5			1
		KIT p.P838L	38		0.42		1				FGFR3	44	1.17	1.27			1
		KRAS p.G12C	34	3.92	37.4			1			MYC	56	2.04	3.3			1
		PIK3CA p.C420R	48	0.28	1.02			1			MYC	56	1.83	1.58			1
		PIK3CA p.E542K	27	0.52		1									4	4	11	19
		PIK3CA p.E545K	24	35.76	13.96			1
		PIK3CA p.E545K	26	0.6	0.6			1
		PIK3CA p.E545K	56	34.5	10.6			1
		PIK3CA p.E545K	21	0.07	1.3			1
		PIK3CA p.E545K	42	0.64	1.05			1
		PIK3CA p.E545K	50	0.11	0.08			1
		PIK3CA p.E545K	57	16.4	20.1			1
		PIK3CA p.G914R	19	2.8	4.2			1
		PIK3CA p.H1047R	18	8.6	6.6			1
		PIK3CA p.H1047R	31	12.5	29.3			1
		SMAD4 p.R361H	38	0.09		1
		TP53 p. P278A	47	0.1		1
		TP53 p.A276D	38	7.3	20.02			1
		TP53 p.C141Y	58	0.95	6.6			1
		TP53 p.C238Y	22		0.3		1
		TP53 p.D324fs	12	0.1		1
		TP53 p.E294*	18	3.4	3.8			1
		TP53 p.G245D	44		0.86		1
		TP53 p.G245S	48	0.11		1
		TP53 p.G245S	21	17.7	13.7			1
		TP53 p.G266V	56	72.28	18.9			1
		TP53 p.H179L	57	2.2		1
		TP53 p.H193R	23	3.47	1.9			1
		TP53 p.M237I	33		0.5		1
		TP53 p.M246V	25		0.3		1
		TP53 p.R175H	15	0.2		1
		TP53 p.R175H	28	4.4	0.25			1
		TP53 p.R213*	45	11	7.3			1
		TP53 p.R213Q	22		0.1		1
		TP53 p.S127F	40	2.06		1
		TP53 p.S240R	29	0.16		1
		TP53 p.V157F	31	5.9	16.5			1
		TP53 p.Y220C	42	0.68		1
				45	41	12	8	33	53

## Sheet: Fig.S2b_V32
	b		SNVs		oncoKB Level T0					oncoKB Level Tp
			T0	Tp	1	2	3	4	NA	1	2	3	4	NA
		AKT p.E17K	0.87	4.5	1					1									oncoKB Level T0					oncoKB Level Tp
		ERBB2 p.D769Y	2.1		1
		ERBB2 p.L755S	1.95	42.3	1					1							CNVs
		ERBB2 p.L755S	0.82	1.69	1					1							T0	Tp	1	2	3	4	NA	1	2	3	4	NA
		ERBB2 p.L755S	3.9	4.4	1					1						CCND1	2.65	2.65					1					1
		ERBB2 p.V777L	1.1		1											CCND2		1.67										1
		ESR1 p.D538G	0.4	1.41	1					1						CDK4	1.68	1.68				1					1
		ESR1 p.D538G	0.3	5.9	1					1						ERBB2		1.21						1
		ESR1 p.D538G	0.1	0.21	1					1						ERBB2	1.42		1
		ESR1 p.D538G	28.65	1.88	1					1						ERBB2	1.3	1.48	1					1
		ESR1 p.E380Q		2.5						1						ERBB2	2.03	1.35	1					1
		ESR1 p.E380Q	0.47	0.34	1					1						ERBB2	9.71		1
		ESR1 p.S463P	0.97	0.37	1					1						ERBB2	1.36		1
		ESR1 p.Y537N		0.2						1						ERBB2	1.38		1
		ESR1 p.Y537S	0.05	5.2	1					1						ERBB2		4.47						1
		GNAS p.R201C	0.45	0.58					1					1		ERBB2		1.85						1
		KIT p.P838L		0.42					1					1		ERBB2	4.25	2.09	1					1
		KRAS p.G12C	3.92	37.4	1					1						ERBB2	5.67	3.86	1					1
		PIK3CA p.C420R	0.28	1.02	1					1						FGFR1		3.15						1
		PIK3CA p.E542K	0.52		1											FGFR1		5.5						1
		PIK3CA p.E545K	35.76	13.96	1					1						FGFR3	1.17	1.27	1					1
		PIK3CA p.E545K	0.6	0.6	1					1						MYC	2.04	3.3	1									1
		PIK3CA p.E545K	34.5	10.6	1					1						MYC	1.83	1.58	1									1
		PIK3CA p.E545K	0.07	1.3	1					1							13	15	11	0	0	1	1	10	0	0	1	4
		PIK3CA p.E545K	0.64	1.05	1					1
		PIK3CA p.E545K	0.11	0.08	1					1
		PIK3CA p.E545K	16.4	20.1	1					1
		PIK3CA p.G914R	2.8	4.2		1					1
		PIK3CA p.H1047R	8.6	6.6	1					1
		PIK3CA p.H1047R	12.5	29.3	1					1
		SMAD4 p.R361H	0.09						1
		TP53 p. P278A	0.1						1
		TP53 p.A276D	7.3	20.02					1					1
		TP53 p.C141Y	0.95	6.6					1					1
		TP53 p.C238Y		0.3										1
		TP53 p.D324fs	0.1						1
		TP53 p.E294*	3.4	3.8					1					1
		TP53 p.G245D		0.86										1
		TP53 p.G245S	0.11						1
		TP53 p.G245S	17.7	13.7					1					1
		TP53 p.G266V	72.28	18.9					1					1
		TP53 p.H179L	2.2						1
		TP53 p.H193R	3.47	1.9										1
		TP53 p.M237I		0.5										1
		TP53 p.M246V		0.3										1
		TP53 p.R175H	0.2						1
		TP53 p.R175H	4.4	0.25					1					1
		TP53 p.R213*	11	7.3					1					1
		TP53 p.R213Q		0.1										1
		TP53 p.S127F	2.06						1
		TP53 p.S240R	0.16						1
		TP53 p.V157F	5.9	16.5					1					1
		TP53 p.Y220C	0.68						1
					25	1	0	0	19	24	1	0	0	16

## Sheet: Fig.S3_V32
	a		NGS vs dPCR					first dPCR run vs second run
			pts	NGS	dPCR		timepoint	1st run	2nd run
			pt13	1.2	1.1		T0	12.5	13.18
			pt14	0.21	0.12		T1	0.4	0.43
			pt17	0.1	0.4		T2	0.52	0.44
			pt18	9	8.6		T3	5.5	5.51
			pt19	3.2	3.9		T4	8.1	7.79
			pt20	2.1	0.97		T5	6.9	7.58
			pt21	17.7	20.3		T6	2.8	2.83
			pt22	0.3	0.22		T7	3.3	3.3
			pt23	0.1	0.1		T8	5	5.22
			pt23	3.7	3.47		T9	7.7	8.31
			pt24	34.9	35.8		T10	9	9.7
			pt25	0.2	0		T11	5.3	5.6
			pt26	0.19	0.6		T12	16.1	15.9
			pt27	0.17	0.52		T13	10.3	11.49
			pt28	0	4.4		T14	10.2	10.5
			pt30	1.1	0		T15	10.9	11.1
			pt31	11.1	12.5		T16	11.4	12.95
			pt31	5.8	5.9		T17	10.9	12.27
			pt33	0.28	0.06		T18	12.6	14.4
			pt34	4	3.9		T19	11.9	13.59
			pt37	2	0		T20	8.8	9.37
			pt38	6.1	7.3		T21	9	9.56
			pt42	0.3	0.64		T22	21.6	22.1
			pt45	8.8	11		T23	29.3	28.1
			pt50	0.4	0.5
			pt51	0.12	0.11
			pt52	0.99	0.9
			pt52	30.8	28.7
			pt52	1	0.8
			pt55	3	2.1
			pt58	1.8	1.4
			pt58	0.71	0.95

## Sheet: Fig.S5_V32
	Correlation matrix
	best OR vs PFS						best cOR vs PFS
	pts	PFS (days)	PR/CR	SD	PD		pts	PFS (days)	cPR/CR	cSD	PD
	17	174		1			17	174		1
	18	154		1			18	154	1
	19	770		1			19	770	1
	20	434	1				20	434	1
	22	287		1			22	287			1
	23	175		1			23	175		1
	24	175		1			24	175	1
	25	196		1			25	196			1
	26	287		1			26	287	1
	28	182		1			28	182	1
	30	987	1				30	987		1
	31	581		1			31	581	1
	33	84			1		33	84		1
	34	532		1			34	532			1
	37	182		1			37	182			1
	38	154		1			38	154	1
	40	264		1			40	264	1
	42	543		1			42	543	1
	44	315	1				44	315			1
	45	146		1			45	146	1
	48	146		1			48	146	1
	50	84			1		50	84	1
	51	330		1			51	330		1
	52	147		1			52	147	1
	56	62			1		56	62			1
	57	182		1			57	182	1
	58	75			1		58	75			1
							57	65	1						57	989	1
							58	40			1				58	720			1

[truncated: 2 more sheets: Fig.S6_V32, Fig.S7]
